# Supplementary material for: Pullulan-Based Active Coating Incorporating Potassium Metabisulfite Maintains Postharvest Quality and Induces Disease Resistance to Soft Rot in Kiwifruit
Source: MDPI journal article supplement (doi:10.3390/foods12173197), 2023-08-24
Supplement: s1 [file s1]

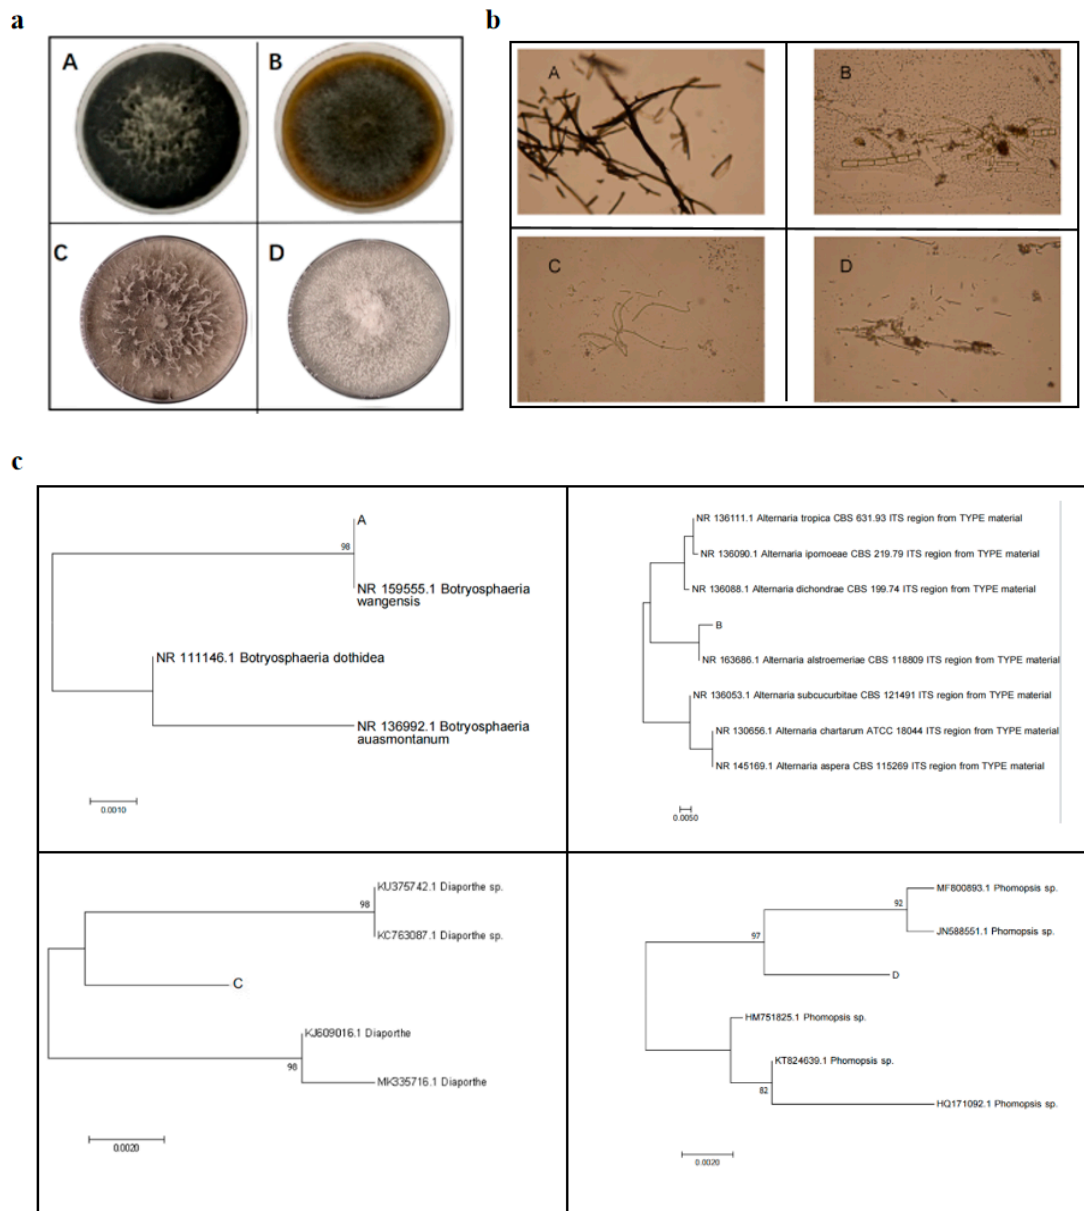

**Figure. S1.** Colony morphology (a), Morphology of conidiophore (b), and Phylogenetic tree (c) of isolates from kiwifruit: *Botryosphaeria dothidea* (A), *Alternaria* sp. (B), *Diaporthe* sp. (C), *Phomopsis* sp. (D).
