# Supplementary figures and images for: Pullulan-Based Active Coating Incorporating Potassium Metabisulfite Maintains Postharvest Quality and Induces Disease Resistance to Soft Rot in Kiwifruit
Source: MDPI journal article supplement (doi:10.3390/foods12173197), 2023-08-24

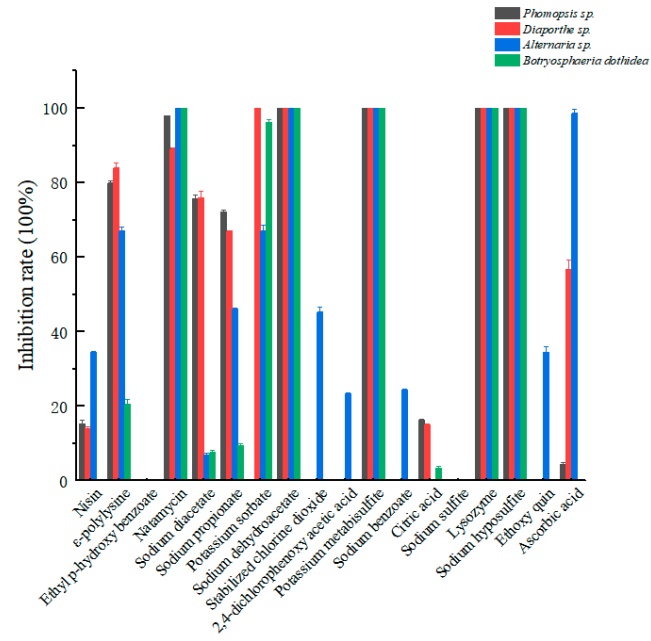

**Figure. S2.** Inhibition rate of 18 food additives on four pathogens.

Supplement: s1 [file s1]
